# Supplementary material
Source: PubMed Central journal article supplement (PMC3365729)

Plant Leucine Aminopeptidases Moonlight as Molecular Chaperones

Melissa A. Scranton, Ashley Yee, Sang-Youl Park, and Linda L. Walling

SUPPLEMENTARY TABLES

Supplementary Table 1. Primers used for cloning of *AtLAP* cDNAs.

| Locus            | Gene          | Primer name | Primer sequence <sup>A</sup>              |
|------------------|---------------|-------------|-------------------------------------------|
| <i>At2g24200</i> | <i>AtLAP1</i> | LAP1-F      | 5'-AGCATATGATGGCTCACA <u>CTCYCGGT</u> -3' |
|                  |               | LAP1-R      | 5'-ATGCGGCCGCTCACGAAGATGAATTCTTC-3'       |
| <i>At4g30920</i> | <i>AtLAP2</i> | LAP2-F      | 5'-GCATATGGC-TCATACAATCTCACACGC-3'        |
|                  |               | LAP2-R      | 5'-GCTCGAGTTAAGAAGAAGAATGGTTCTGT-3'       |

<sup>A</sup> Restriction enzyme sites for cloning of *AtLAP* cDNAs were incorporated into the forward (F) and reverse (R) primers. These sites are underlined and correspond to NdeI (LAP1-F, LAP2-F), NotI (LAP1-R), and XhoI (LAP2-R) sites.

**Supplementary Table 2. Summary of Chaperone Assays for Plant LAPs.**

|               | <b>CS Protection at<br/>1:3</b> | <b>Lowest conc (<math>\mu</math>M)<br/>of NdeI Protection</b> | <b>% Luc<br/>Recovering at<br/>1:3</b> |
|---------------|---------------------------------|---------------------------------------------------------------|----------------------------------------|
| <b>LAP-A</b>  | 40-60%                          | 1                                                             | 14-20%                                 |
| <b>LAP-N</b>  | 40-60%                          | 0.2                                                           | 17%                                    |
| <b>AtLAP1</b> | 0%                              | 1                                                             | 16%                                    |
| <b>AtLAP2</b> | N.D.                            | 0.2                                                           | 18-19%                                 |

**Supplementary Table 3. Summary of Chaperone Assays for Tomato LAP-A and LAP-N mutants.**

|                |       | <b>CS<br/>Protection at<br/>1:3</b> | <b>Lowest conc<br/>(<math>\mu</math>M) of Ndel<br/>Protection</b> | <b>% Luc<br/>Recovering<br/>at 1:3</b> | <b>Site<br/>Disruption</b> | <b>Hexamer<br/>Disruption</b> |
|----------------|-------|-------------------------------------|-------------------------------------------------------------------|----------------------------------------|----------------------------|-------------------------------|
| <b>LAP-A</b>   | D347N | 0%                                  | 1                                                                 | 17-18%                                 | Zinc ion binding           | no                            |
| <b>Mutants</b> | D347R | 100%                                | 0.2                                                               | ~30%                                   | Zinc ion binding           | yes                           |
|                | E429R | 0%                                  | 0.4                                                               | ~30%                                   | Zinc ion binding           | yes                           |
|                | E429V | 40-60%                              | 1                                                                 | 17-18%                                 | Zinc ion binding           | no                            |
|                | K354E | 100%                                | 0.2                                                               | 40%                                    | Catalysis                  | yes                           |
|                | K354R | 40-60%                              | 1                                                                 | 17-18%                                 | Catalysis                  | no                            |
|                | R431A | 40-60%                              | 1                                                                 | ~22%                                   | Catalysis                  | no                            |
| <b>LAP-N</b>   | K357E | 0%                                  | 0.2                                                               | 13%                                    | Catalysis                  | no                            |
| <b>Mutants</b> | K357R | N.D.                                | 0.2                                                               | 0%                                     | Catalysis                  | no                            |

**Supplemental Table 4. Percent Wild-type His<sub>6</sub>-LAP-N enzyme activity on Leu-AMC substrate**

| His <sub>6</sub> -LAP-N enzyme | % Wild-type His <sub>6</sub> -LAP-N enzyme activity |
|--------------------------------|-----------------------------------------------------|
| Wild-Type                      | 100                                                 |
| K357E                          | 0.35 ± 0.03                                         |
| K357R                          | 0.93 ± 0.07                                         |
| K357L                          | 0.7 ± 0.09                                          |
| K357C                          | 0.26 ± 0.11                                         |
| K357M                          | 1.47 ± 0.04                                         |
| K357G                          | 0.84 ± 0.07                                         |
| K357T                          | 0.28 ± 0.03                                         |
| K357P                          | 0.34 ± 0.13                                         |

Purified His<sub>6</sub>-LAPs (2160 ng) were assayed for activity towards Leu-AMC (1.58 μM) in assay buffer (50 mM Tris-HCl, pH 8, 0.5 mM MnCl<sub>2</sub>) in a total volume of 162 μl. Activity assays proceeded for 30 min at 37°C. Rate of hydrolysis was determined and activity expressed as percent of wild-type His<sub>6</sub>-LAP-N activity which was 0.24 ± 0.01 μmol mg<sup>-1</sup> min<sup>-1</sup> of protein (± SD).

## SUPPLEMENTAL LEGENDS AND FIGURES

### SUPPLEMENTARY FIGURE LEGENDS

FIGURE S1. **LAP-A protects NdeI from thermal inactivation in the absence of glycerol.** His<sub>6</sub>-LAP-A was isolated and stored in the absence of glycerol. Restriction enzyme NdeI (1 U) was incubated in 1X restriction enzyme buffer 4 with or without His<sub>6</sub>-LAP-A (0-2 μM) for 90 min at 43°C. After thermal deactivation, 140 ng of plasmid DNA was added and digested for 90 min at 37°C. Control lanes show plasmid DNA only with supercoiled (SC) monomer and multimers and DNA after digestion with unheated NdeI. NdeI released a 4.6-kb and 0.2 kb fragment (not shown).

FIGURE S2. ***Pisum sativum* Hsp18.1 protects NdeI from thermal inactivation.** Restriction enzyme NdeI (1 U) was incubated alone or with 0.2-2 μM His<sub>6</sub>-LAP-A or PsHSP18.1 (Panel A) or protein A (Panel B). NdeI was heat denatured at 43°C and plasmid DNA was digested as described in Fig. 1. Control lanes show plasmid DNA only and DNA after digestion with unheated NdeI.

FIGURE S3. **PsHsp18.1 protects citrate synthase from thermal aggregation.** Citrate synthase (300 nM; CS) was incubated in 50 mM HEPES-KOH (pH 7.5), 5% glycerol, and 0 (□) or 900 nM His<sub>6</sub>-LAP-A (■), PsHSP18.1 (●), or protein A (x) at 43°C for 60 min. Aggregation of CS was determined by measuring light scattering at 360 nm. Neither PsHSP18.1 (○) nor protein A (Δ) aggregated on their own. Data shown is representative of two independent experiments.

FIGURE S4. ***Pisum sativum* Hsp18.1 aids in refolding of firefly luciferase.** Luc (1 μM) was heated at 42°C for 11 min with 1 μM PsHsp 18.1 (●, Panel A), 3 μM His<sub>6</sub>-LAP-A (■, Panel B), 3 μM protein A (x, Panel B), or no chaperone (□, Panels A-B) and then allowed to refold in rabbit reticulocyte lysate (RRL) in refolding buffer supplemented with 2 mM ATP. Percent activity corresponds to the relative luminescence compared to unheated luciferase. Measurements were taken for three technical replicates. Data is representative of at least 2 independent experiments.

FIGURE S5. **LAP1 does not protect citrate synthase from thermal aggregation.** Citrate synthase (300 nM; CS) was incubated in 50 mM HEPES-KOH (pH 7.5), 5% glycerol, and 0 (▲) or 900 (□) nM His<sub>6</sub>-LAP1 at 43°C for 60 min. Aggregation of CS was determined by measuring light scattering at 360 nm. LAP1 (Δ) did not aggregate on its own. Data shown is representative of two independent experiments.

FIGURE S6. **Oligomeric structure of LAP-A mutants.** A, Purified His<sub>6</sub>-LAP-As (10 μg) were fractionated on a native polyacrylamide gel (9% w/v). Protein bands were visualized by staining with Coomassie Brilliant Blue R-250. Masses of each multimer were determined as in Panel B. B, Purified wild-type and mutant His<sub>6</sub>-LAP-As (10 μg) were fractionated on a set of four native polyacrylamide gels (7.5-12% w/v). Molecular mass standards were chicken egg albumin (45 kDa); bovine serum albumin monomer (66 kDa) and dimer (132 kDa); and tomato His<sub>6</sub>-LAP-A hexamer (357 kDa). LAP oligomer species masses were determined by their relative mobility and retardation coefficient as previously described (36).

FIGURE S7. **LAP-A active site point mutants protect a NdeI from thermal inactivation.** Restriction enzyme NdeI (1 U) was incubated alone or with 0.2-2 μM His<sub>6</sub>-LAP-A, K354E, R431A, E429V, E429R, K354R, D347N, or D347R. NdeI was heat denatured and plasmid DNA was digested as described in Fig. 1. Control lanes show plasmid DNA only and DNA after digestion with unheated NdeI.

FIGURE S8. **Oligomeric structure of LAP-N mutants.** Purified His<sub>6</sub>-LAP-Ns (10 μg) were fractionated on a native polyacrylamide gel (9% w/v). Protein bands were visualized by staining with Coomassie Brilliant Blue R-250.

FIGURE S9. **LAP-N mutants protect NdeI from thermal inactivation.** Restriction enzyme NdeI (1 U) was incubated alone or with 0.2-2 μM His<sub>6</sub>-LAP-N, K357E, or K357R. NdeI was heat denatured at 43°C and plasmid DNA was digested as described in Fig. 1. Control lanes show plasmid DNA only and DNA after digestion with unheated NdeI.

FIGURE S10. **LAP-N mutants do not protect CS from thermal aggregation** Citrate synthase (300 nM; CS) was incubated in 50 mM HEPES-KOH (pH 7.5), 5% glycerol, and 0 (□) or 900 nM His<sub>6</sub>-LAP-N (■), K357E (◆), or K357R (▲) at 43°C for 60 min. Aggregation of CS was determined by measuring light scattering at 360 nm. K357E (◇) had a small amount of aggregation on its own while K357R (Δ) highly aggregated its own. Data shown is representative of two independent experiments.

FIGURE S11. **LAP-N mutants have lower chaperone activity based on the Luc refolding assay.** Luc (1 μM) was heated for 11 min at 42°C with 3 μM His<sub>6</sub>-LAP-N (■), K357E (◆), or K357R (▲), or no chaperone (□) and then allowed to refold in rabbit reticulocyte lysate (RRL) in refolding buffer supplemented with 2 mM ATP. Percent activity corresponds to the relative luminescence compared to unheated luciferase. Measurements were taken for three technical replicates. Data is representative of at least two independent experiments.

Figure S1

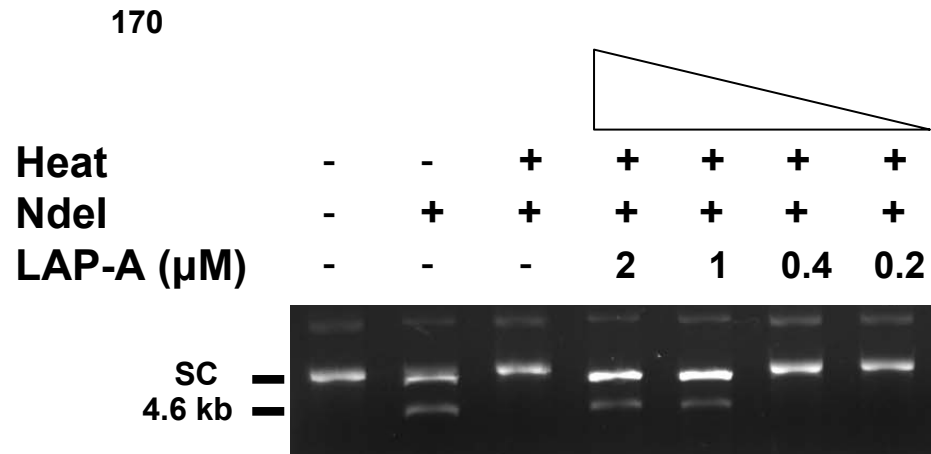

Figure S2

**A**

|                           |   |   |   |   |   |     |     |   |   |     |     |
|---------------------------|---|---|---|---|---|-----|-----|---|---|-----|-----|
|                           |   |   |   |   |   |     |     |   |   |     |     |
| Heat                      | - | - | + | + | + | +   | +   | + | + | +   | +   |
| NdeI                      | - | + | + | + | + | +   | +   | + | + | +   | +   |
| LAP-A ( $\mu\text{M}$ )   | - | - | - | 2 | 1 | 0.4 | 0.2 | - | - | -   | -   |
| HSP18.1 ( $\mu\text{M}$ ) | - | - | - | - | - | -   | -   | 2 | 1 | 0.4 | 0.2 |

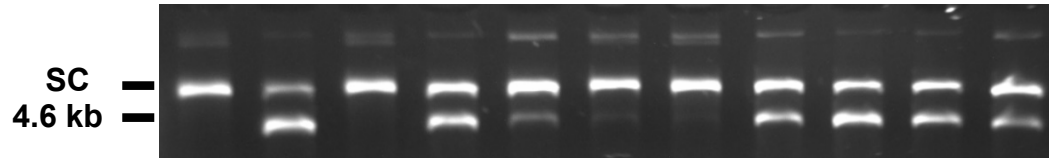

**B**

|                             |   |   |   |   |   |     |     |
|-----------------------------|---|---|---|---|---|-----|-----|
|                             |   |   |   |   |   |     |     |
| Heat                        | - | - | + | + | + | +   | +   |
| NdeI                        | - | + | + | + | + | +   | +   |
| Protein A ( $\mu\text{M}$ ) | - | - | - | 2 | 1 | 0.4 | 0.2 |

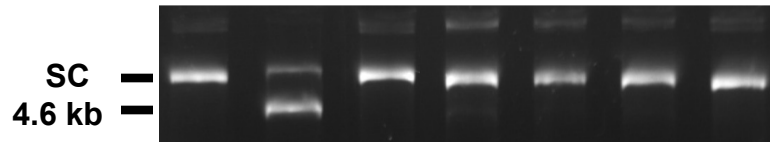



Figure S3

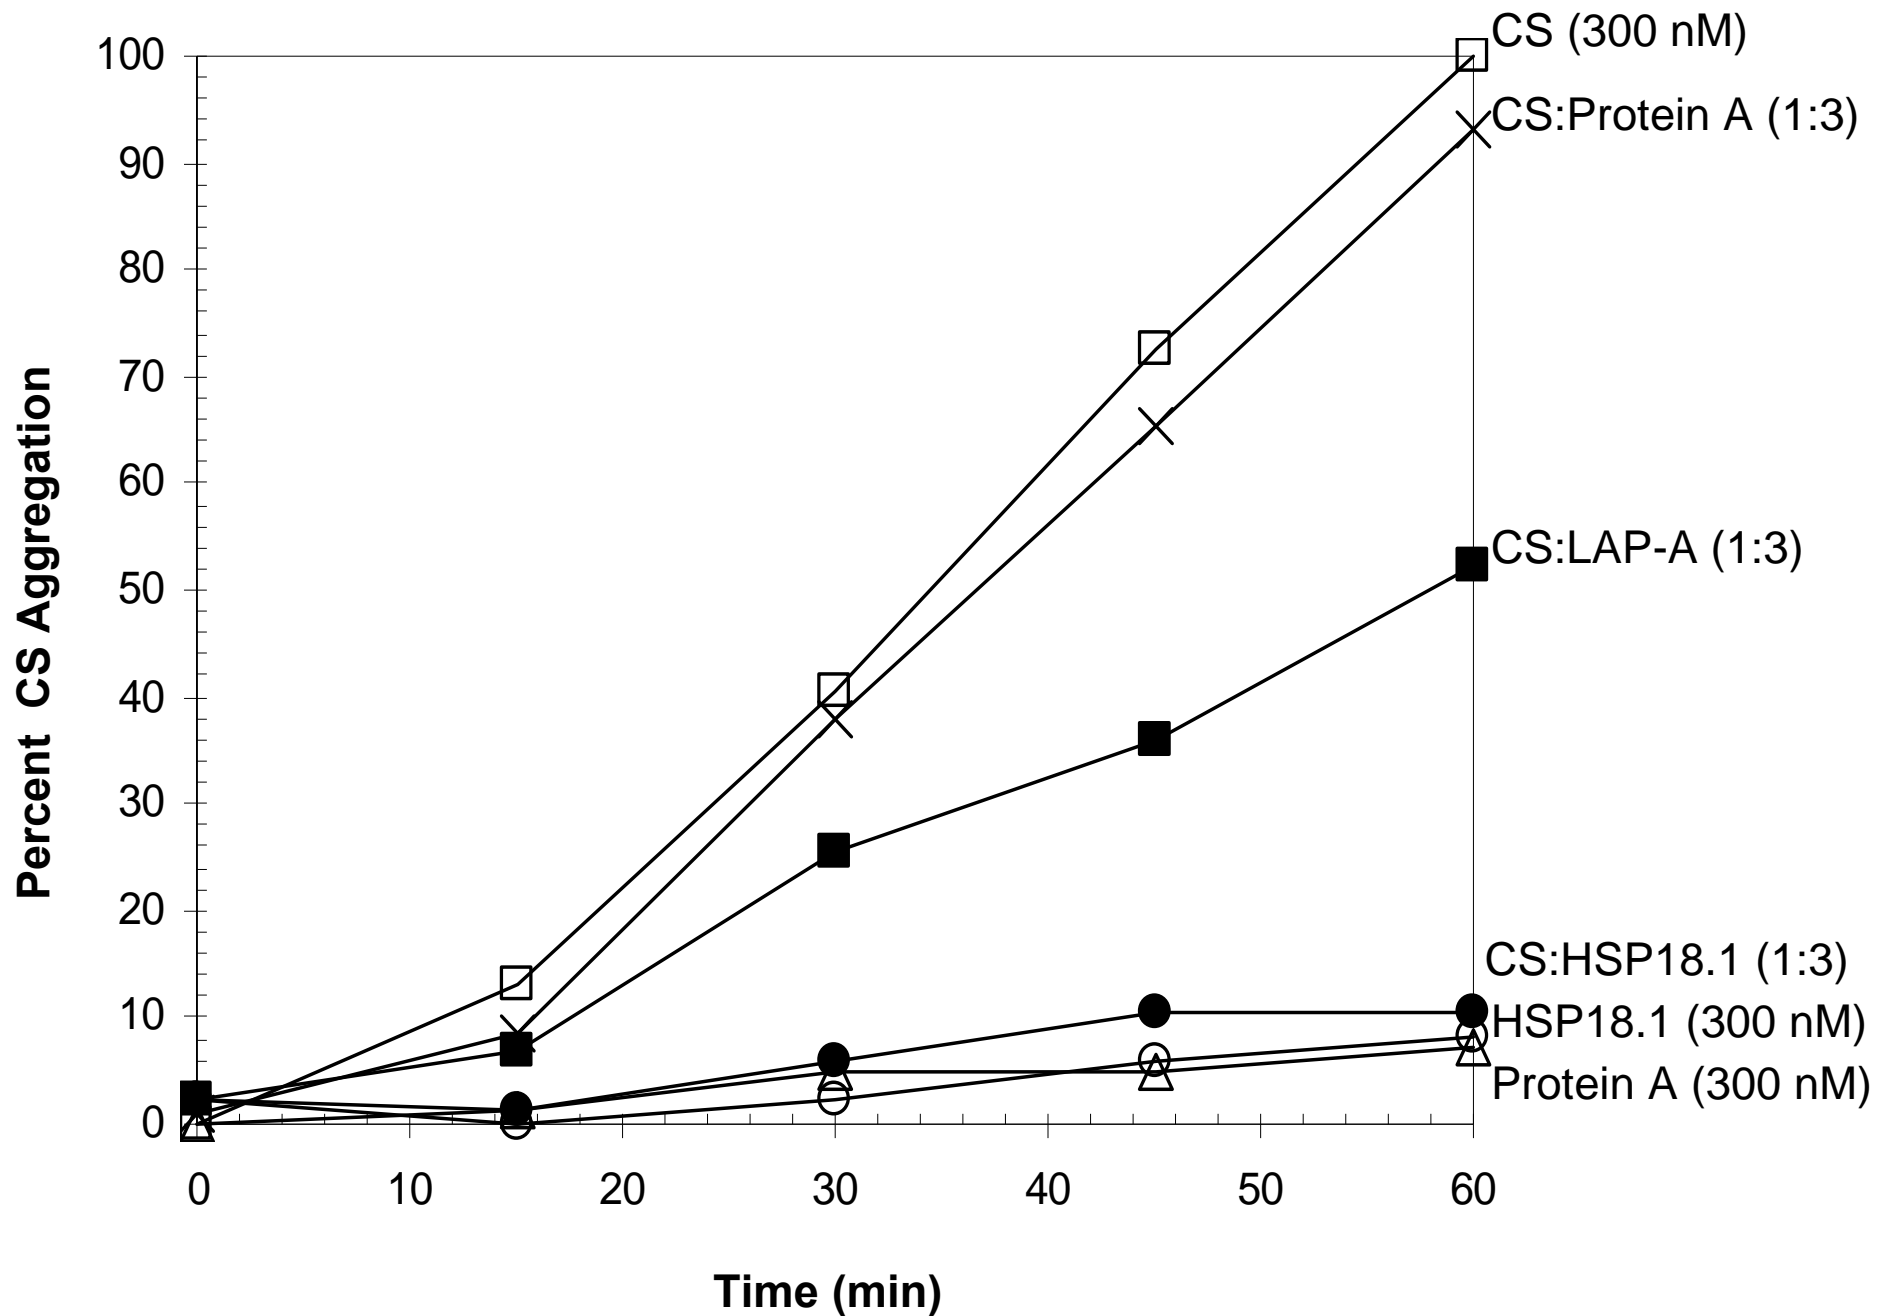

Figure S4

**A**

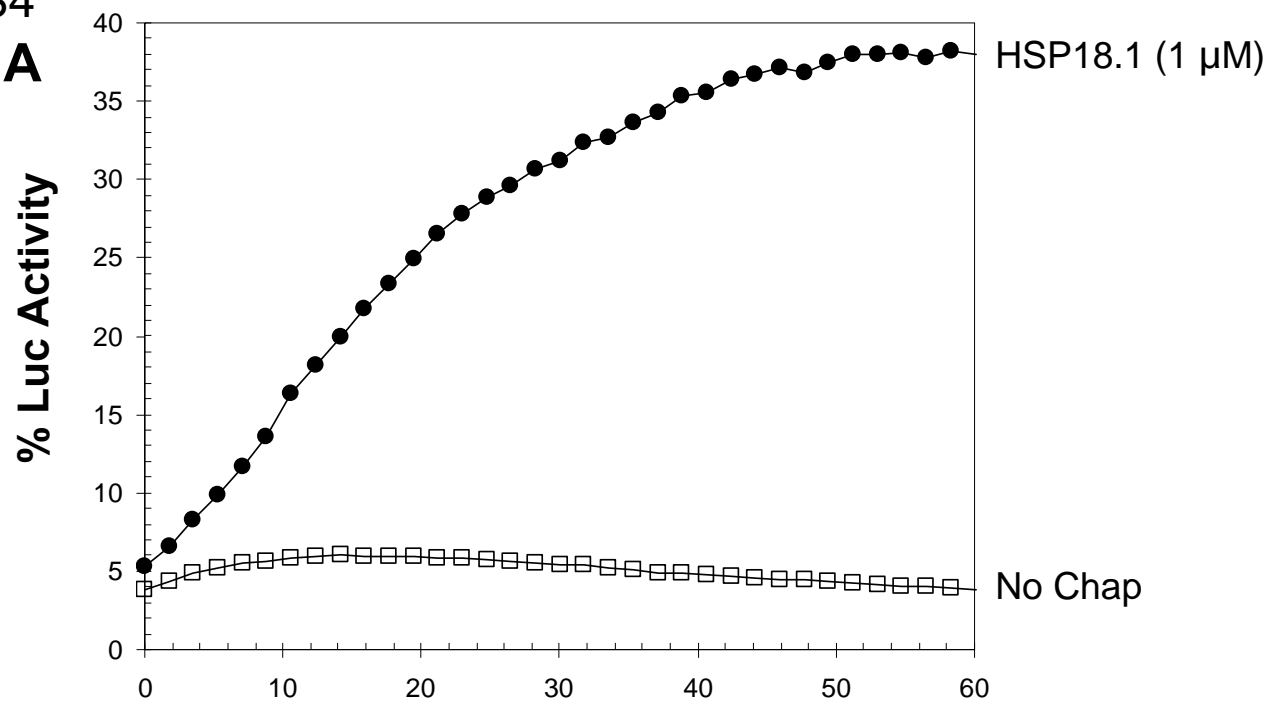

**B**

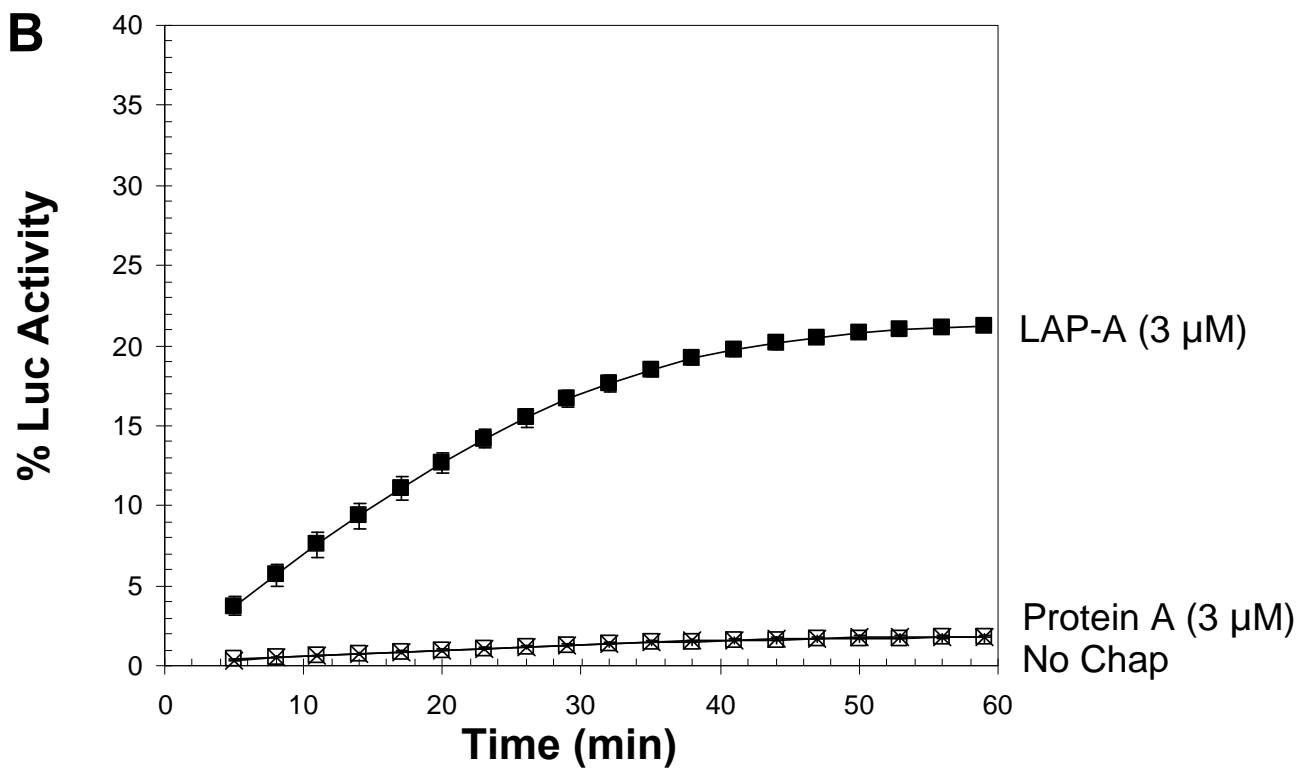

Figure S5

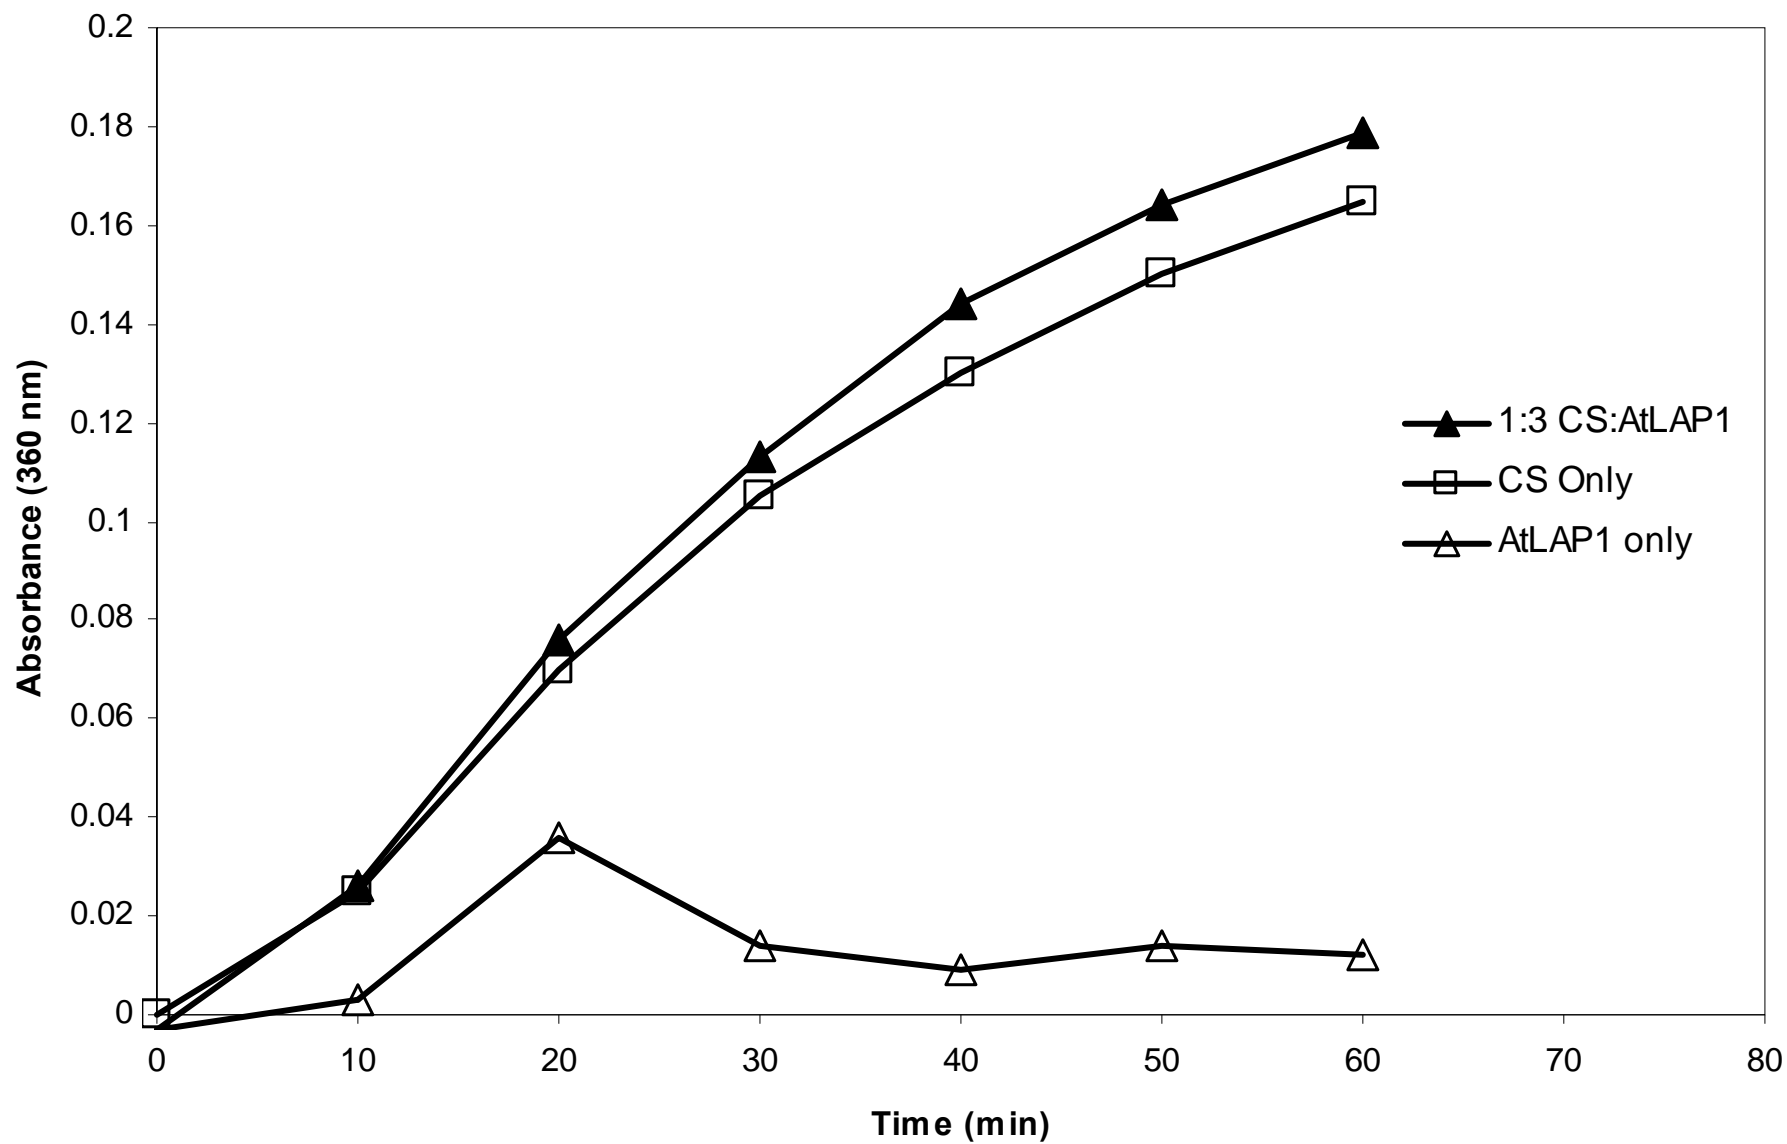

Figure S6

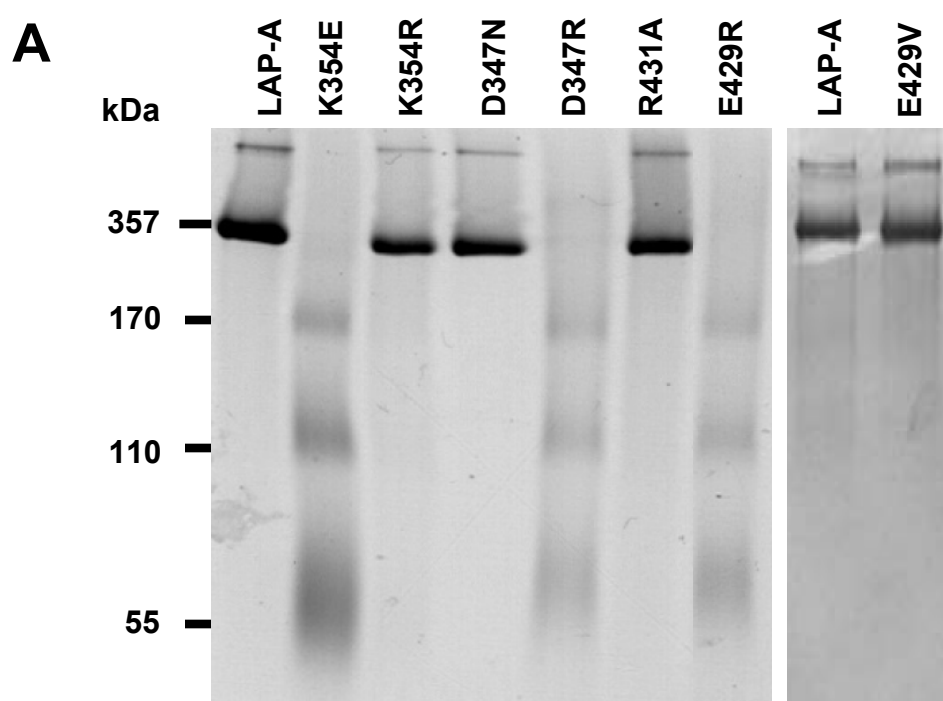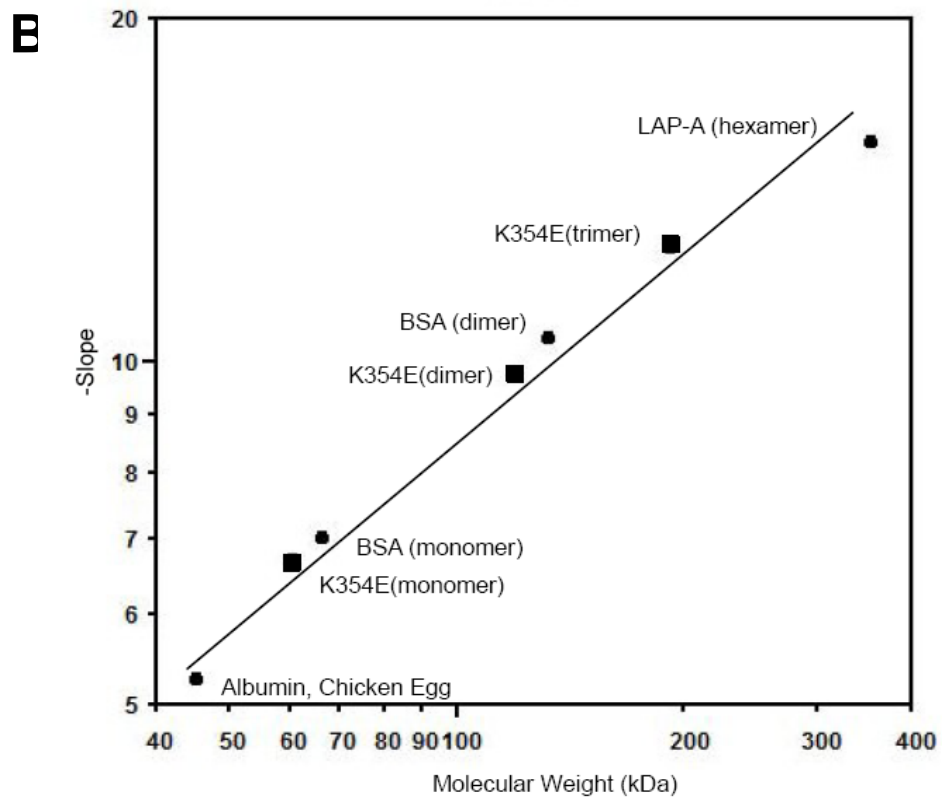

Figure S7

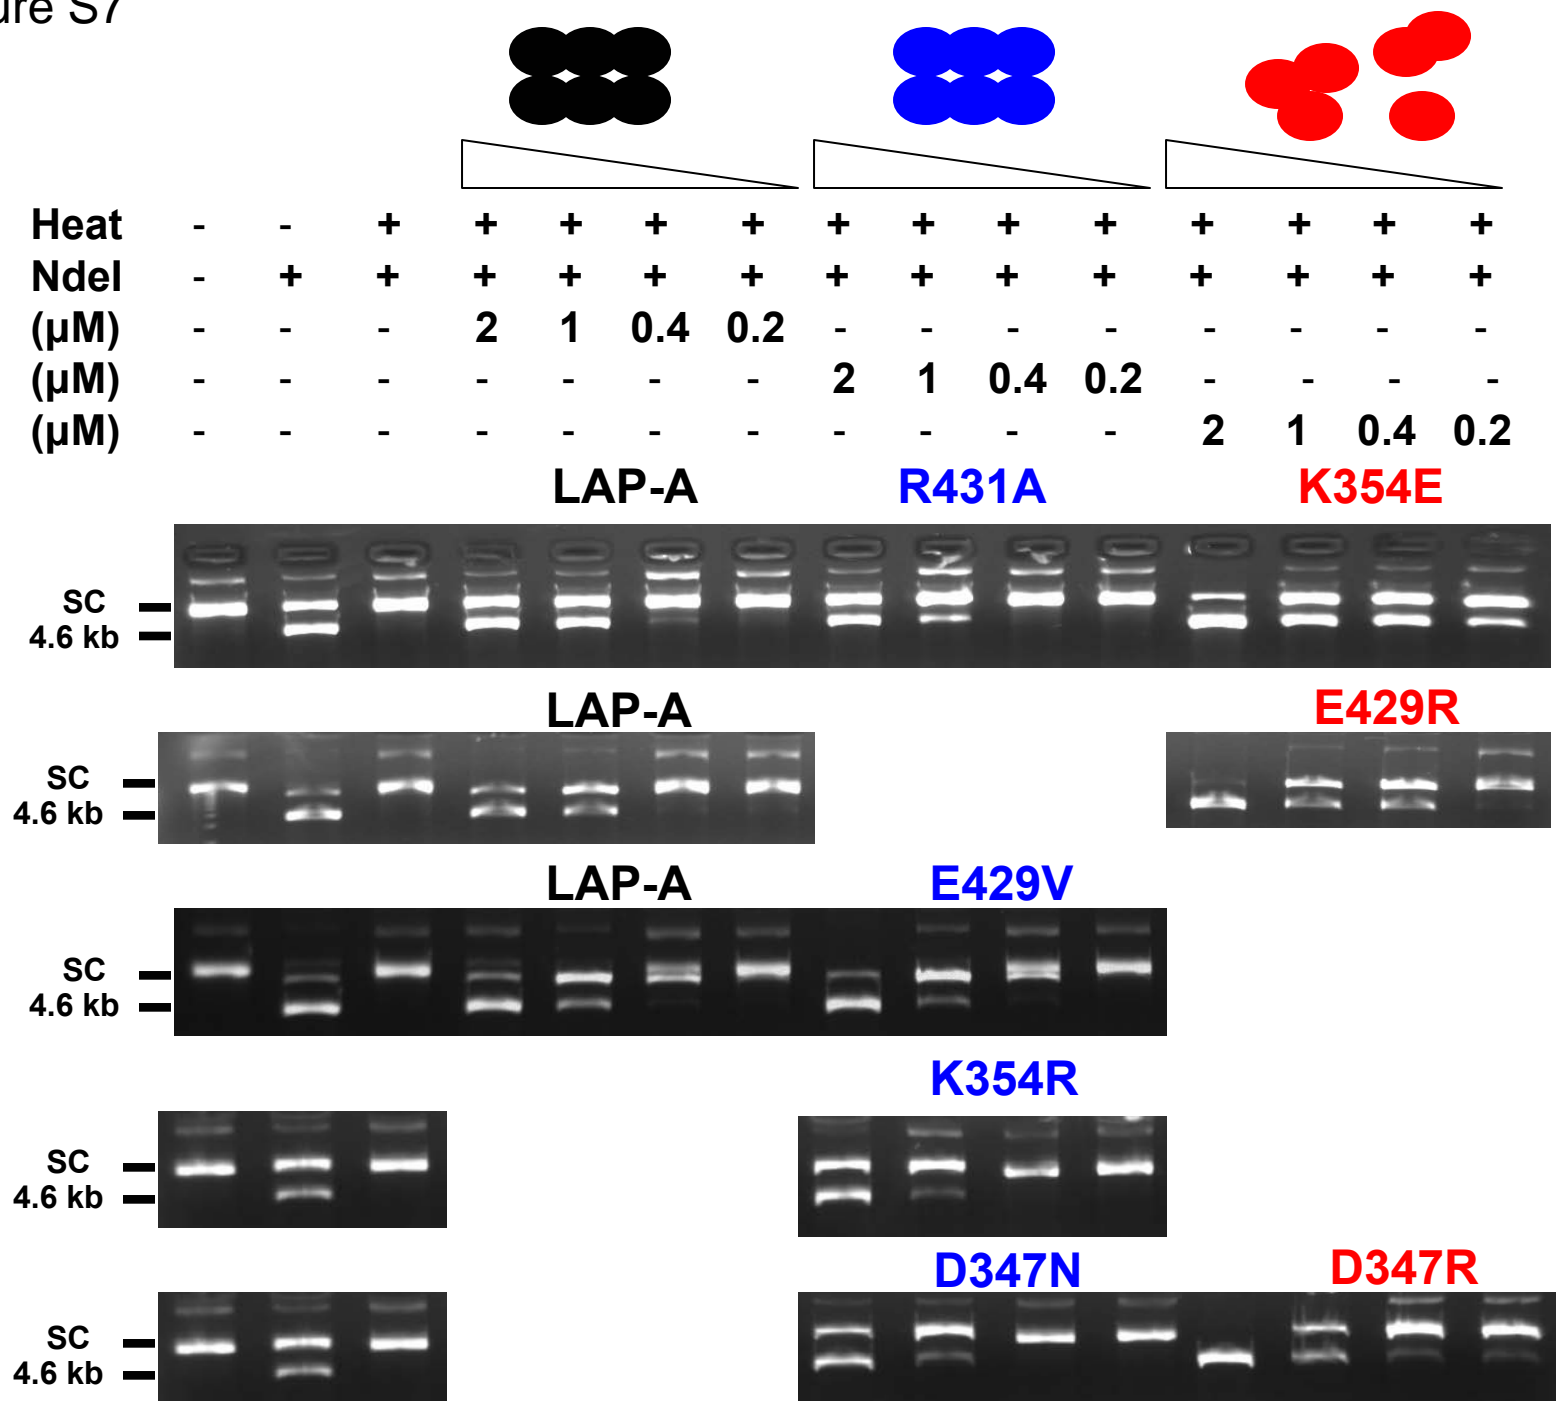

Figure S8

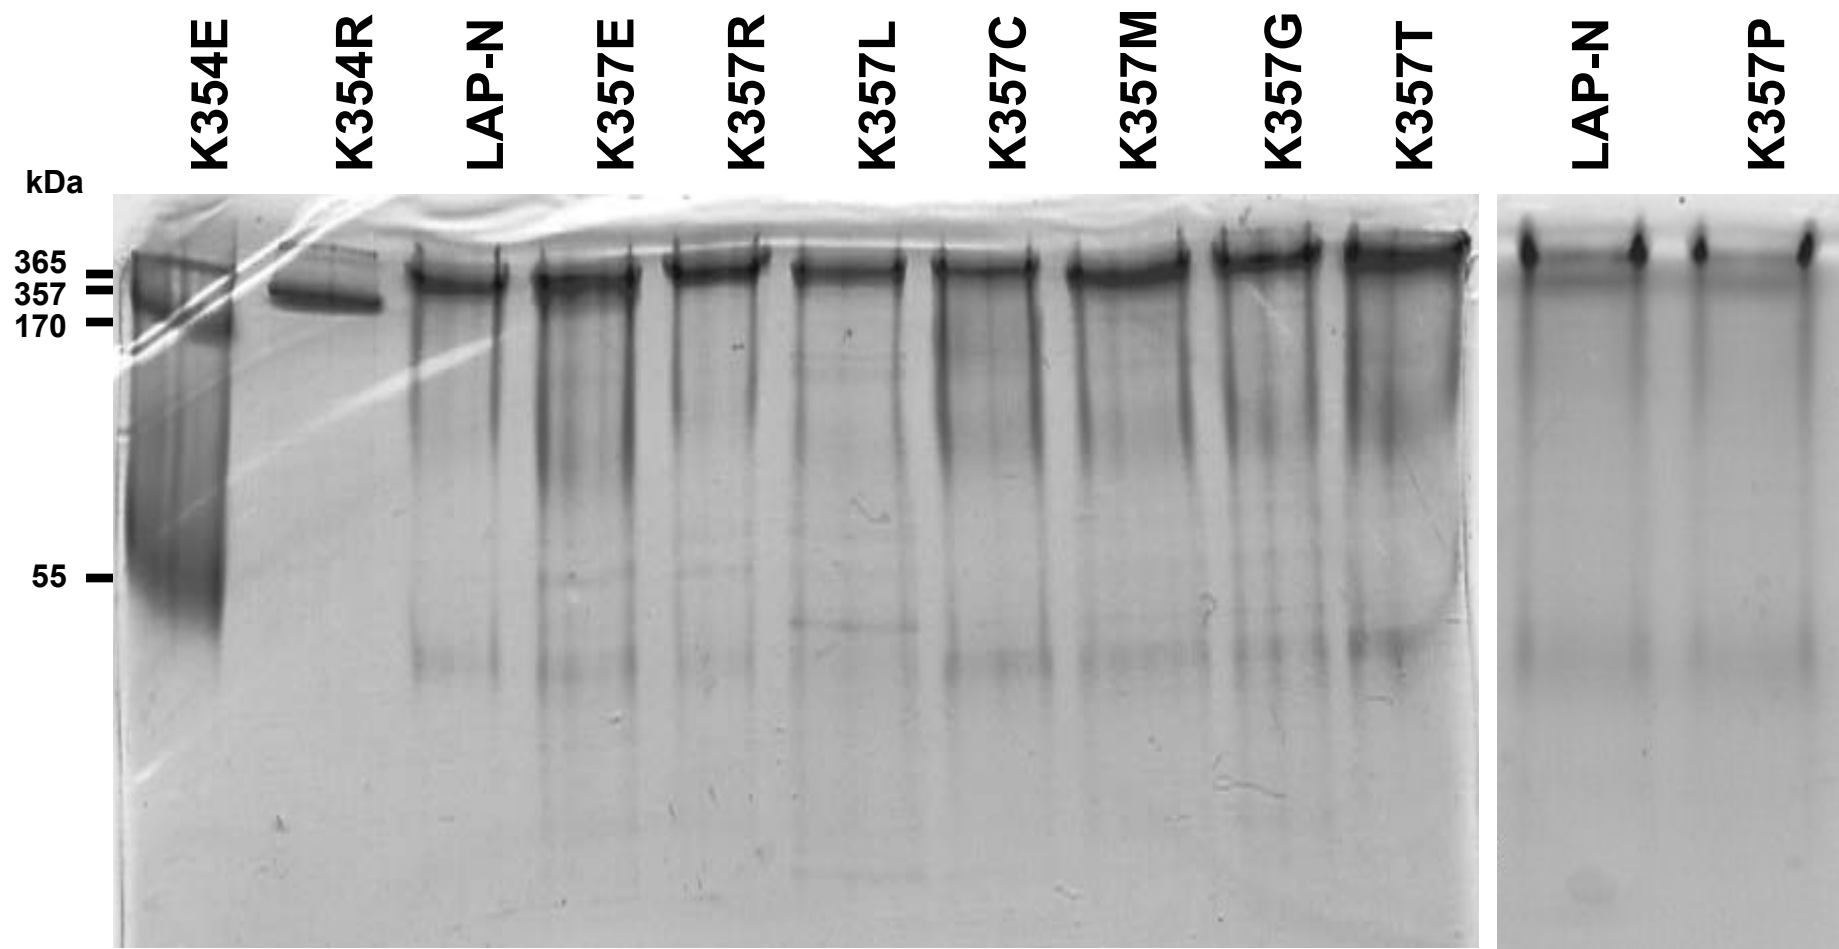

Figure S9

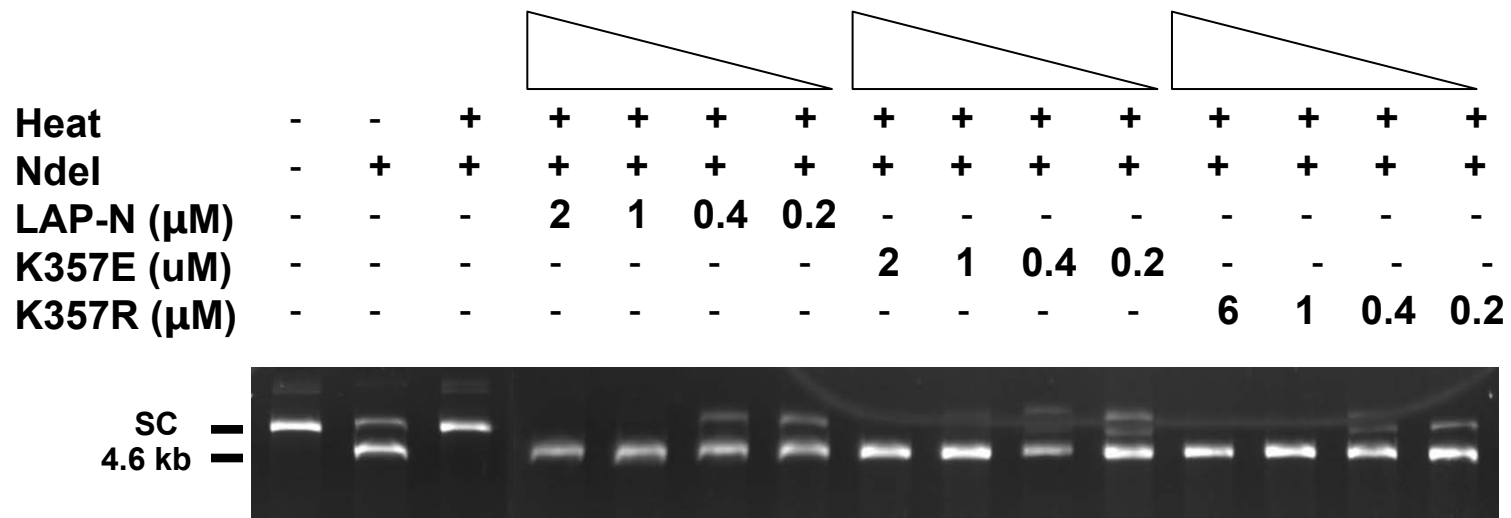

Figure S10

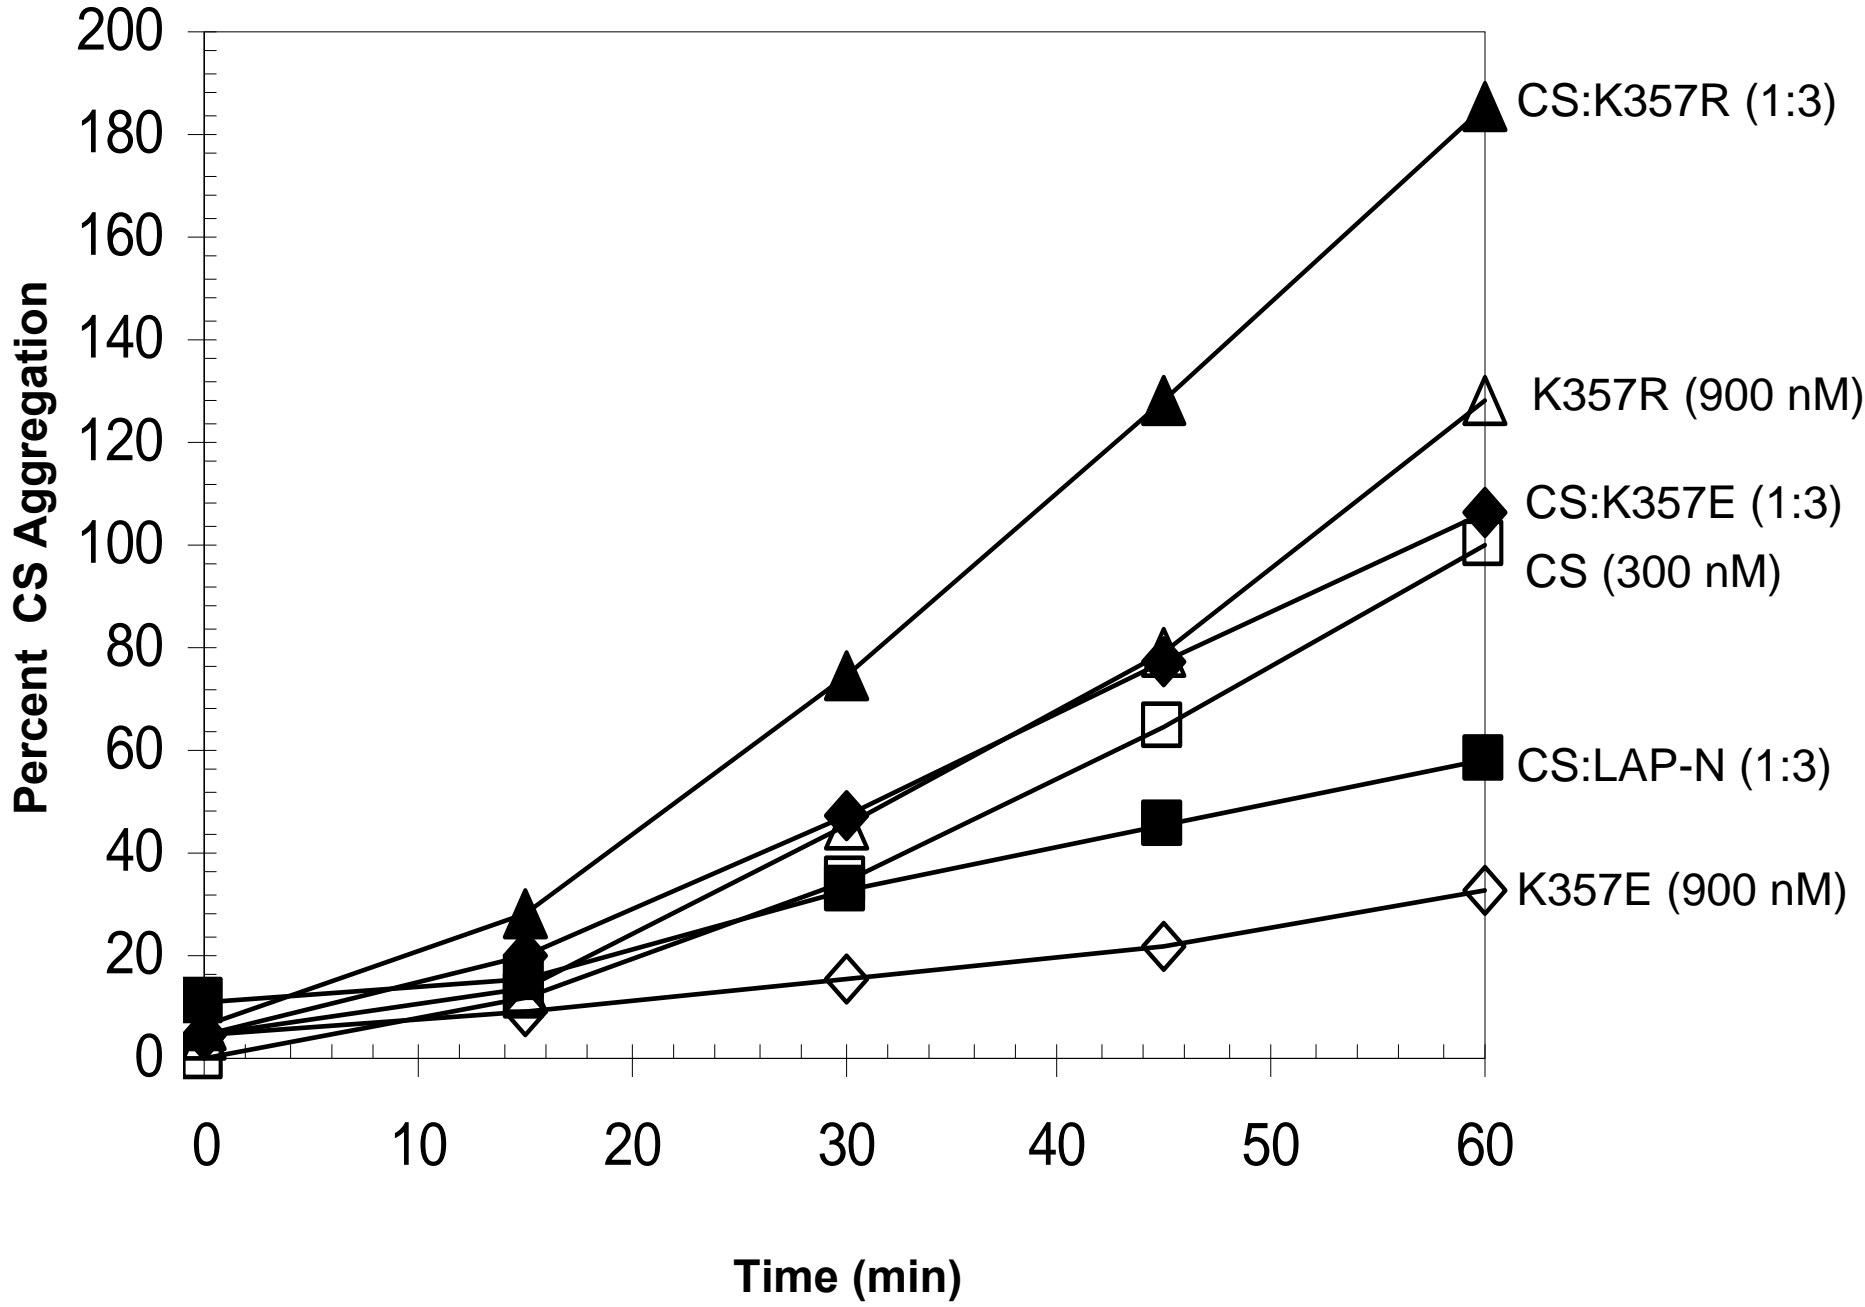



Figure S11

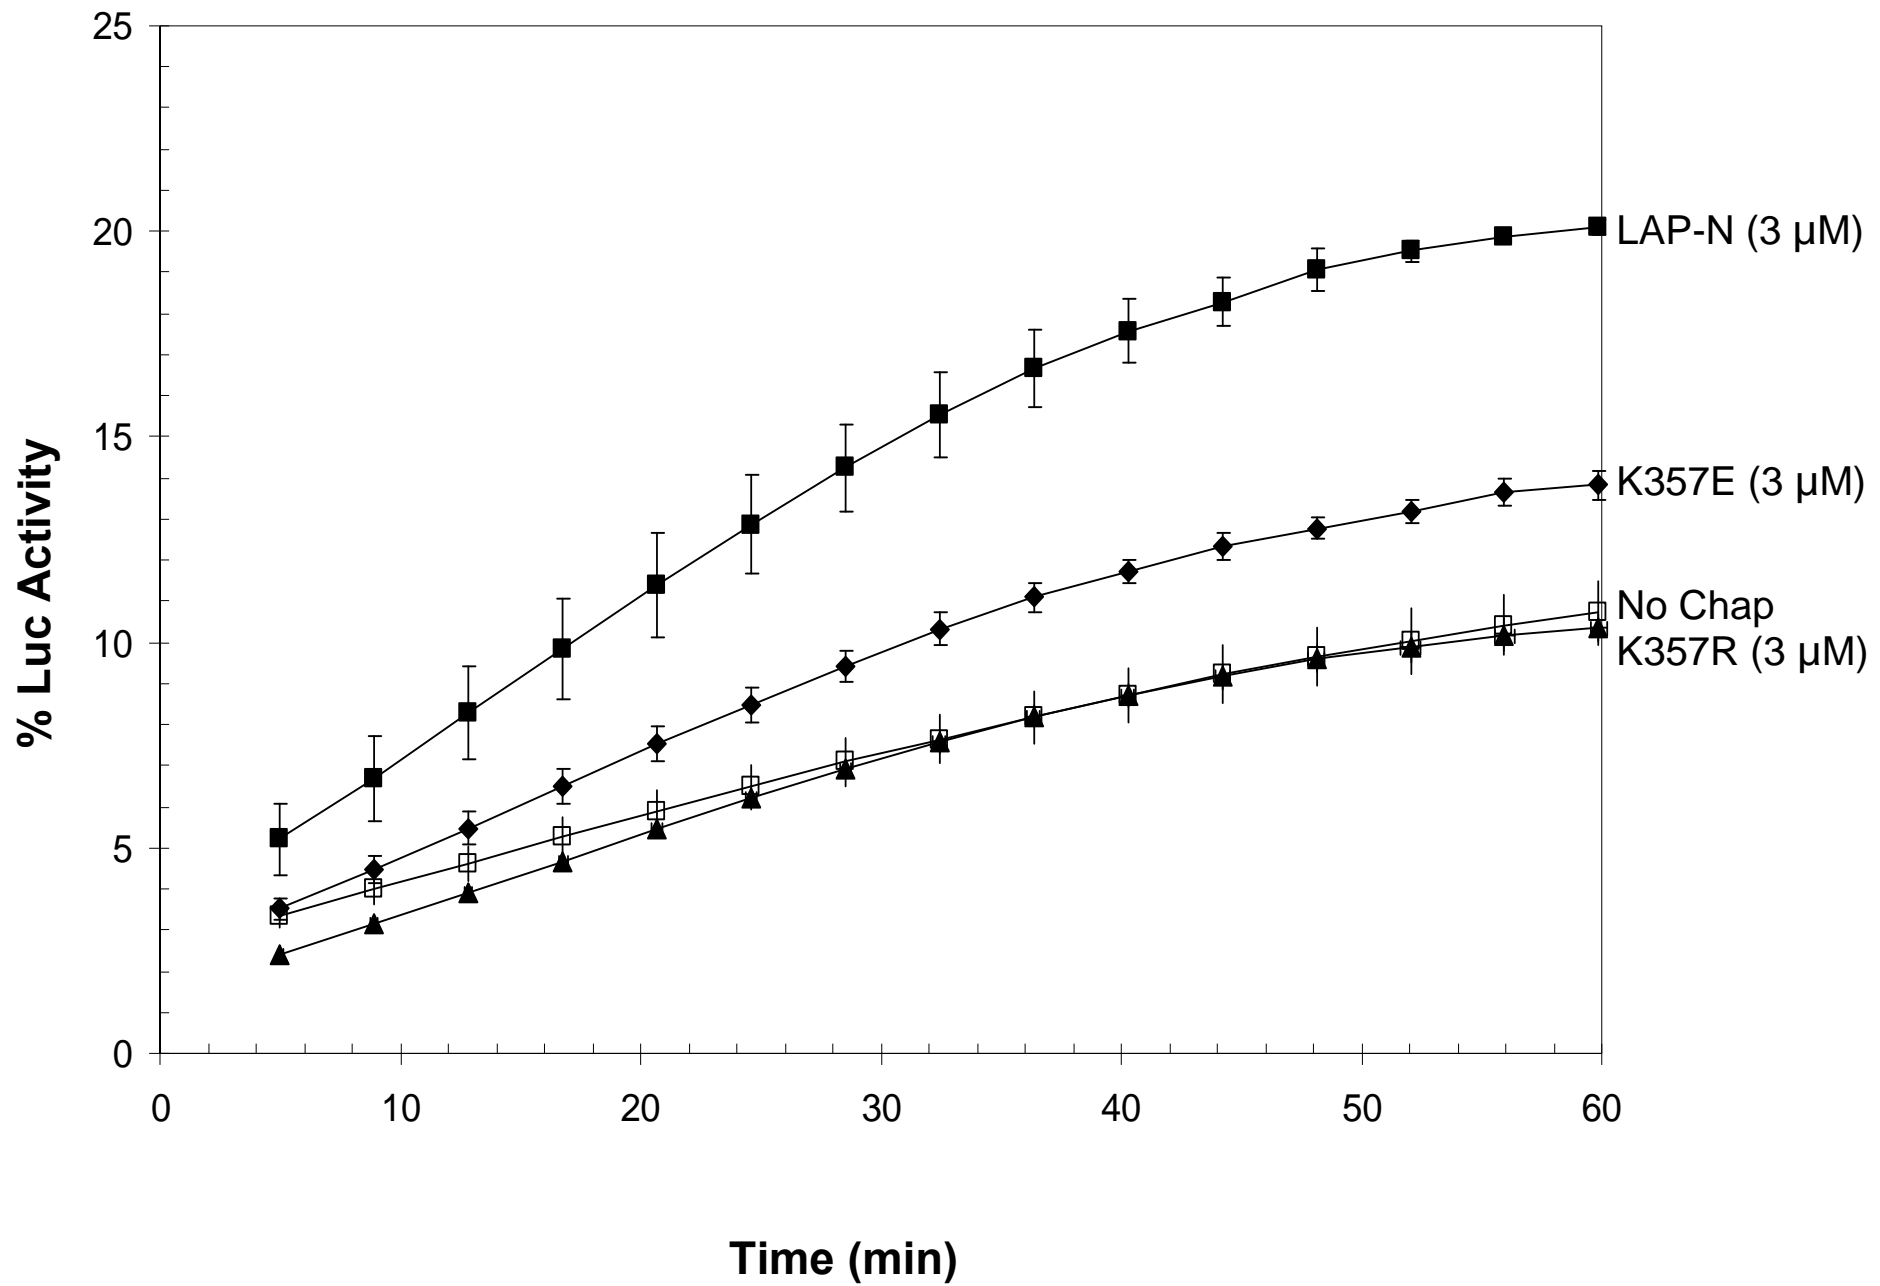

Supplement: supp_M111.309500_jbc.M111.309500-1.pdf [file supp_M111.309500_jbc.M111.309500-1.pdf]
